# Supplementary material for: Down syndrome critical region protein 5 regulates membrane localization of Wnt receptors, Dishevelled stability and convergent extension in vertebrate embryos
Source: Oxford University Press journal article supplement (doi:10.1242/dev.032649), 2009-05-22
Supplement: dev032649-tabless1-s2.pdf [file dev032649-tabless1-s2.pdf]

**Table S1. Rescue of explant elongation by *gly4ΔC* in activin-treated *Xenopus* animal cap explants overexpressing *dscr5***

| Construct injected           | Elongated (%) | Rounded (%) | Total |
|------------------------------|---------------|-------------|-------|
| Uninjected/activin           | 77%           | 23          | 119   |
| <i>dscr5</i> /activin        | 21            | 79          | 113   |
| <i>dscr5/gly4ΔC</i> /activin | 67            | 33          | 120   |

**Table S2. The effect of *dscr5* overexpression in *Xenopus* whole embryos is rescued by coexpression of *gly4ΔC***

| Construct injected  | Normal (%) | Bent axis (%) | Total |
|---------------------|------------|---------------|-------|
| Uninjected          | 95         | 5             | 135   |
| <i>dscr5</i>        | 33         | 67            | 116   |
| <i>dscr5/gly4ΔC</i> | 73         | 27            | 154   |
